# Supplementary material for: Data quality and 30-day survival for out-of-hospital cardiac arrest in the UK out-of-hospital cardiac arrest registry: a data linkage study
Source: PubMed Central journal article supplement — BMJ Open. 2017 Nov 20;7(11):e017784. doi: 10.1136/bmjopen-2017-017784 (PMC5719320; doi:10.1136/bmjopen-2017-017784), 2017-11-20
Supplement: bmjopen-2017-017784supp001.pdf [file bmjopen-2017-017784supp001.pdf]

## SUPPLEMENTARY DATA

*Table 1: Specific data points increased following linkage*

| Data point | Number increased by linkage<br>(n, % of total cases) |
|------------|------------------------------------------------------|
| NHS        | 1518 (48.7%)                                         |
| Surname    | 7 (0.2%)                                             |
| Forename   | 8 (0.3%)                                             |
| Postcode   | 942 (30.2%)                                          |
